# Supplementary material for: Dopamine Transporter Genetic Reduction Induces Morpho-Functional Changes in the Enteric Nervous System
Source: MDPI journal article supplement (doi:10.3390/biomedicines9050465), 2021-04-24
Supplement: s1 [file s1]

SUPPLEMENTARY FIGURE

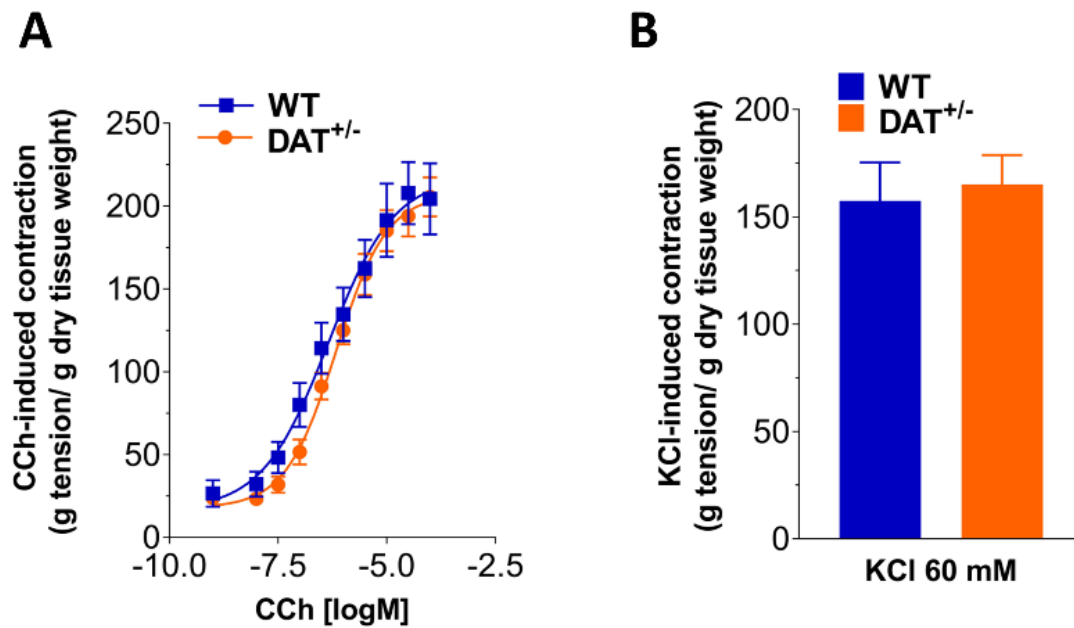

**Supplementary Figure S1.** DAT hypofunction does not influence ileal muscular response. **(A)** Concentration–response curves to carbachol (CCh), **(B)** KCl-mediated excitatory response in isolated ileal preparations of WT and DAT<sup>+/-</sup> mice. Data are reported as mean  $\pm$  SEM.
